# Supplementary material for: Glucagon-like peptide 1 receptor agonist use and risk of thyroid cancer: Scandinavian cohort study
Source: PubMed Central journal article supplement (PMC11004669; doi:10.1136/bmj-2023-078225), 2024-04-10
Supplement: pasb078225.ww.pdf [file pasb078225.ww.pdf]

**SUPPLEMENTARY APPENDIX**

**Glucagon-like peptide 1 receptor agonist use and risk of thyroid cancer: Scandinavian cohort study**

Pasternak et al.

**eTable 1.** Exclusions Criteria with Definitions

| Criterion                                                                                                                                                                                                                                                        | Codes (ICD-10, NCSP, or ATC)                                                                                                                                                                                                                                                                                                                                                       |
|------------------------------------------------------------------------------------------------------------------------------------------------------------------------------------------------------------------------------------------------------------------|------------------------------------------------------------------------------------------------------------------------------------------------------------------------------------------------------------------------------------------------------------------------------------------------------------------------------------------------------------------------------------|
| Thyroid cancer at any time before cohort entry                                                                                                                                                                                                                   | ICD-10: C73 (from cancer and patient registers)                                                                                                                                                                                                                                                                                                                                    |
| Any cancer record (except non-melanoma skin cancer) in last year before cohort entry                                                                                                                                                                             | ICD-10: C00-C43, C45-C97, D45 (from cancer and patient registers)                                                                                                                                                                                                                                                                                                                  |
| Endstage illness (severe malnutrition, cachexia, dementia, coma, end-stage renal disease, organ transplant) at any time before cohort entry <sup>a</sup>                                                                                                         | <p>ICD-10: E40-E43, F00-F03, G30, R40.2, R64, N18.5, N18.6, Z99.2, Z49, T86, Y83.0, Z48.2, Z94</p> <p>NCSP: KAS, FQA, FQB, JJC, GDG; Sweden: DR012, DR013, DR014, DR015, DR016, DR023, DR024, DR055, DR056, DR060, DR061; Denmark: (B)JFD, (B)JFZ; Norway: A0093, A0094, JAGD30, JAGD31, JAGD32, JAGD50, JAK10, PHGX00, PHGX05, RXGD05, RXGD20, RXGD25, TJA33</p> <p>ATC: N06D</p> |
| HIV at any time before cohort entry <sup>a</sup>                                                                                                                                                                                                                 | ICD-10: B20, B21-B24, R75, Z21, O98.7                                                                                                                                                                                                                                                                                                                                              |
| Drug misuse, alcohol abuse and nicotine dependence in last year before cohort entry                                                                                                                                                                              | ICD-10: F10-F19, R78.1-R78.5, T40 <sup>b</sup> ; ATC: N07BB, N07BC                                                                                                                                                                                                                                                                                                                 |
| Major pancreatic disease (chronic pancreatitis [defined by pancreatic enzyme substitution prescription within last year or diagnosis at any time before cohort entry], pancreatic cancer, major pancreatic surgery at any time before cohort entry) <sup>a</sup> | ICD-10: C25, K86.0, K86.1, K90.3, Z94.83; NCSP: JLC, JLE; ATC: A09AA02                                                                                                                                                                                                                                                                                                             |
| Genetic syndromes associated with thyroid cancer at any time before cohort entry <sup>a</sup>                                                                                                                                                                    | ICD-10: Q78.1, Q85.8, Q85.9                                                                                                                                                                                                                                                                                                                                                        |
| No health care contact in last year before cohort entry                                                                                                                                                                                                          | Neither outpatient specialist care contact, hospitalization, nor use of any prescription drug                                                                                                                                                                                                                                                                                      |

Abbreviations: ICD, International Classification of Diseases; NCSP, NOMESCO Classification of Surgical Procedures; ATC, Anatomical Therapeutic Chemical

- a. 10 years look-back in Sweden, Denmark; 2 years look-back in Norway.
- b. Not available in Norway.

**eTable 2.** Subtypes of Thyroid Cancer as Defined by ICD-O/3 Morphology Codes in the Cancer Registers

| <b>Subtype</b> | <b>ICD-O/3 morphology code</b>                                                                                                               |
|----------------|----------------------------------------------------------------------------------------------------------------------------------------------|
| Follicular     | 83301, 83303, 83313, 83353, 83403, 82903, 83463*                                                                                             |
| Medullary      | 83453, 85103, 83463*                                                                                                                         |
| Papillary      | 80503, 82603, 83413, 83443                                                                                                                   |
| Other          | 80103, 80213, 81403, 814039, 85893, 80313, 84803, 84303, 80203,<br>80703, 83503, 80413, 80123, 82303, 824633, 83363, 83373, 959133,<br>96803 |

\*code 83463 defines mixed medullary-follicular thyroid carcinoma and was therefore included in both follicular and medullary thyroid cancer categories

**eTable 3. Covariate Definitions**

| <b>Covariate</b>                                                                                 | <b>Definitions</b>                                                                                                                                                                                                                                                                                                                                                          |
|--------------------------------------------------------------------------------------------------|-----------------------------------------------------------------------------------------------------------------------------------------------------------------------------------------------------------------------------------------------------------------------------------------------------------------------------------------------------------------------------|
| Age                                                                                              | 5-year intervals                                                                                                                                                                                                                                                                                                                                                            |
| Sex                                                                                              | Women/men                                                                                                                                                                                                                                                                                                                                                                   |
| Interaction between age and sex                                                                  | Age category x sex                                                                                                                                                                                                                                                                                                                                                          |
| Place of birth                                                                                   | Scandinavia; Rest of Europe; Outside Europe                                                                                                                                                                                                                                                                                                                                 |
| Civil status                                                                                     | Living with partner; Not living with partner; Missing                                                                                                                                                                                                                                                                                                                       |
| <b><i>Medical history (5 yr look-back in Sweden and Denmark; 2 year look-back in Norway)</i></b> |                                                                                                                                                                                                                                                                                                                                                                             |
| Cardiovascular disease                                                                           | ICD-10: I09.8, Z95.1, Z95.5, I11, I20, I21, I22, I24, I25, I130, I132, I34-I37, I42, I43, I44-I47, I48, I49, I50, I60-I69, I70, I72, I73, I74, I77, J81, G45 (excl G453, G454), G46, K550, K551, E115, E145, E135; Procedure codes: FNA, FNB, FNC, FND, FNE, FNG, FNP02, FNP12, FNQ05, FNQ12, FNR22, PDA-PDW, PFA-PFW, PEA-PEW                                              |
| Diabetes complications                                                                           | ICD-10: E110, E111, E112, E113, E114, E116, E117, E118, E130, E131, E133, E134, E136, E137, E138, E140, E141, E142, E143, E144, E146, E147, E148, E160, E161, E162, G990, G590, G632, H280 <sup>a</sup> , H358, H360, I120, I131, I132, L984, M142, M146, M908, N00-08, N10-N16, N17, N18, N19, N20-N23, N25-N29; Procedure codes <sup>a</sup> : CKC10, CKC12, CKC15, CKD65 |
| Obesity diagnosis                                                                                | ICD-10: E66                                                                                                                                                                                                                                                                                                                                                                 |
| Thyroid disorders                                                                                | ICD-10: E00-E07                                                                                                                                                                                                                                                                                                                                                             |
| Thyroid biopsy <sup>a</sup>                                                                      | Procedure codes: BAA00, TBA00, TBA10, TBA20                                                                                                                                                                                                                                                                                                                                 |
| Thyroid surgery <sup>a</sup>                                                                     | Procedure codes: BAA (not BAA00)                                                                                                                                                                                                                                                                                                                                            |
| Hyperthyroidism treatment in last yr. <sup>a</sup>                                               | ATC: H03BA02, H03BB02                                                                                                                                                                                                                                                                                                                                                       |
| Thyroid hormone replacement therapy in last yr.                                                  | ATC: H03AA01, H03AA02                                                                                                                                                                                                                                                                                                                                                       |
| <b><i>Diabetes drugs in last 6 mo.</i></b>                                                       |                                                                                                                                                                                                                                                                                                                                                                             |
| Metformin                                                                                        | ATC: A10BA02, A10BD02, A10BD03, A10BD05, A10BD07, A10BD08, A10BD10, A10BD11, A10BD13, A10BD14, A10BD15, A10BD16, A10BD20, A10BD22, A10BD23, A10BD25                                                                                                                                                                                                                         |
| Insulin                                                                                          | ATC: A10A                                                                                                                                                                                                                                                                                                                                                                   |
| SGLT2 inhibitors                                                                                 | ATC: A10BK01, A10BK02, A10BK03, A10BK04, A10BD15, A10BD16, A10BD19, A10BD20, A10BD21, A10BD23, A10BD24, A10BD25                                                                                                                                                                                                                                                             |
| Sulphonylureas                                                                                   | ATC: A10BB, A10BD01, A10BD02, A10BD04, A10BD06                                                                                                                                                                                                                                                                                                                              |
| Other antidiabetics (glitazones, glinides, acarbose)                                             | ATC: A10BG, A10BX, A10BF01, A10BF02, A10BD03, A10BD04, A10BD05, A10BD06, A10BD09, A10BD14                                                                                                                                                                                                                                                                                   |
| <b><i>Health care utilization in last yr.</i></b>                                                |                                                                                                                                                                                                                                                                                                                                                                             |

---

|                                       |                      |
|---------------------------------------|----------------------|
| Number of distinct prescription drugs | <5, 6-10, 11-15, ≥16 |
| Number of outpatient physician visits | 0, 1-3, ≥4           |
| Number of hospital admissions         | 0, 1-2, ≥3           |

---

<sup>a</sup> covariate/code not available in Norwegian data

**eTable 4.** Baseline Characteristics of Study Cohort for Additional Analysis Comparing GLP1 receptor agonists vs. SGLT2 Inhibitors

|                                  | Before propensity score weighting  |                              |                             | After propensity score weighting* |                  |                             |
|----------------------------------|------------------------------------|------------------------------|-----------------------------|-----------------------------------|------------------|-----------------------------|
|                                  | GLP1 receptor agonists (n=111,744) | SGLT2 inhibitors (n=148,179) | Standardized difference (%) | GLP1 receptor agonists            | SGLT2 inhibitors | Standardized difference (%) |
|                                  | n (%)                              | n (%)                        |                             | %                                 | %                |                             |
| <i>Country#</i>                  |                                    |                              |                             |                                   |                  |                             |
| Denmark                          | 37,828 (33.9)                      | 46,134 (31.1)                | -                           | 33.9                              | 33.3             | -                           |
| Norway                           | 13,143 (11.8)                      | 26,121 (17.6)                | -                           | 11.8                              | 11.8             | -                           |
| Sweden                           | 60,773 (54.4)                      | 75,924 (51.2)                | -                           | 54.4                              | 54.9             | -                           |
| Men                              | 61,796 (55.3)                      | 95,111 (64.2)                | 18.2                        | 55.3                              | 56.0             | 1.4                         |
| Mean (SD) age, yrs. <sup>†</sup> | 59.1 (12.5)                        | 62.5 (11.3)                  | -                           | 59.1 (12.5)                       | 59.3 (12.4)      | -                           |
| <i>Age group, years</i>          |                                    |                              |                             |                                   |                  |                             |
| 18 to <35                        | 4451 (4.0)                         | 2212 (1.5)                   | 15.3                        | 4.0                               | 3.7              | 1.4                         |
| 35 to <40                        | 3944 (3.5)                         | 2758 (1.9)                   | 10.3                        | 3.5                               | 3.4              | 0.8                         |
| 40 to <45                        | 6813 (6.1)                         | 5546 (3.7)                   | 10.9                        | 6.1                               | 5.8              | 1.0                         |
| 45 to <50                        | 10,476 (9.4)                       | 10,311 (7.0)                 | 8.8                         | 9.4                               | 9.3              | 0.1                         |
| 50 to <55                        | 14,401 (12.9)                      | 16,368 (11.0)                | 5.7                         | 12.9                              | 13.0             | 0.2                         |
| 55 to <60                        | 15,935 (14.3)                      | 20,809 (14.0)                | 0.6                         | 14.3                              | 14.4             | 0.5                         |
| 60 to <65                        | 16,332 (14.6)                      | 23,881 (16.1)                | 4.2                         | 14.6                              | 14.9             | 0.8                         |
| 65 to <70                        | 15,684 (14.0)                      | 24,678 (16.7)                | 7.3                         | 14.0                              | 14.2             | 0.4                         |
| 70 to <75                        | 13,250 (11.9)                      | 22,455 (15.2)                | 9.7                         | 11.9                              | 11.8             | 0.1                         |
| 75 to <80                        | 7572 (6.8)                         | 13,466 (9.1)                 | 8.6                         | 6.8                               | 6.8              | 0.0                         |
| 80 to <85                        | 2886 (2.6)                         | 5695 (3.8)                   | 7.2                         | 2.6                               | 2.6              | 0.3                         |
| <i>Place of birth</i>            |                                    |                              |                             |                                   |                  |                             |
| Scandinavia                      | 94,559 (84.6)                      | 119,087 (80.4)               | 11.2                        | 84.6                              | 84.6             | 0.1                         |
| Rest of Europe                   | 6865 (6.1)                         | 11,381 (7.7)                 | 6.1                         | 6.1                               | 6.2              | 0.0                         |
| Outside Europe                   | 10,320 (9.2)                       | 17,711 (12.0)                | 8.8                         | 9.2                               | 9.3              | 0.1                         |
| <i>Civil status</i>              |                                    |                              |                             |                                   |                  |                             |
| Living with partner              | 60,569 (54.2)                      | 83,813 (56.6)                | 4.7                         | 54.2                              | 53.6             | 1.2                         |
| Not living with partner          | 50,882 (45.5)                      | 63,923 (43.1)                | 4.8                         | 45.5                              | 46.1             | 1.1                         |
| Missing                          | 293 (0.3)                          | 443 (0.3)                    | 0.7                         | 0.3                               | 0.3              | 0.2                         |
| <b>Medical history</b>           |                                    |                              |                             |                                   |                  |                             |
| Cardiovascular disease           | 27,198 (24.3)                      | 43,150 (29.1)                | 10.8                        | 24.3                              | 25.0             | 1.5                         |
| Diabetes complications           | 34,432 (30.8)                      | 40,989 (27.7)                | 6.9                         | 30.8                              | 31.8             | 2                           |
| Obesity diagnosis                | 16,675 (14.9)                      | 10,719 (7.2)                 | 24.7                        | 14.9                              | 15.1             | 0.4                         |
| Thyroid disorders                | 5077 (4.5)                         | 4917 (3.3)                   | 6.3                         | 4.5                               | 4.5              | 0.0                         |
| Thyroid biopsy <sup>‡</sup>      | 278 (0.2)                          | 258 (0.2)                    | 1.6                         | 0.2                               | 0.2              | 0.1                         |
| Thyroid surgery <sup>‡</sup>     | 300 (0.3)                          | 262 (0.2)                    | 1.9                         | 0.3                               | 0.3              | 0                           |

|                                                 |               |                |      |      |      |     |
|-------------------------------------------------|---------------|----------------|------|------|------|-----|
| Hyperthyroidism treatment in last yr. ‡         | 619 (0.6)     | 743 (0.5)      | 0.7  | 0.6  | 0.5  | 0.2 |
| Thyroid hormone replacement therapy in last yr. | 10,886 (9.7)  | 11,412 (7.7)   | 7.2  | 9.7  | 9.8  | 0.1 |
| <b>Diabetes drugs in last 6 mo.</b>             |               |                |      |      |      |     |
| Metformin                                       | 78,155 (69.9) | 121,250 (81.8) | 28.1 | 69.9 | 70.8 | 1.9 |
| Insulin                                         | 38,187 (34.2) | 26,999 (18.2)  | 36.9 | 34.2 | 36.0 | 3.7 |
| DPP4 inhibitors                                 | 8379 (7.5)    | 18,952 (12.8)  | 17.6 | 7.5  | 7.6  | 0.4 |
| Sulphonylureas                                  | 16,957 (15.2) | 26,654 (18.0)  | 7.6  | 15.2 | 15.8 | 1.7 |
| Other antidiabetics                             | 3218 (2.9)    | 4565 (3.1)     | 1.2  | 2.9  | 2.9  | 0.3 |
| <b>Health care utilization in last yr.</b>      |               |                |      |      |      |     |
| <i>Prescription drugs, no.</i>                  |               |                |      |      |      |     |
| <5                                              | 27,198 (24.3) | 40,018 (27.0)  | 6.1  | 24.3 | 23.1 | 2.9 |
| 6-10                                            | 43,858 (39.2) | 63,542 (42.9)  | 7.4  | 39.2 | 39.4 | 0.3 |
| 11-15                                           | 25,449 (22.8) | 30,390 (20.5)  | 5.5  | 22.8 | 23.3 | 1.2 |
| ≥16                                             | 15,239 (13.6) | 14,229 (9.6)   | 12.6 | 13.6 | 14.2 | 1.7 |
| <i>Outpatient physician visits, no.</i>         |               |                |      |      |      |     |
| 0                                               | 36,960 (33.1) | 57,408 (38.7)  | 11.8 | 33.1 | 32.9 | 0.5 |
| 1-3                                             | 49,252 (44.1) | 63,405 (42.8)  | 2.6  | 44.1 | 44.1 | 0.0 |
| ≥4                                              | 25,532 (22.8) | 27,366 (18.5)  | 10.8 | 22.8 | 23.1 | 0.6 |
| <i>Hospital admissions, no.</i>                 |               |                |      |      |      |     |
| 0                                               | 88,645 (79.3) | 119,139 (80.4) | 2.7  | 79.3 | 79.0 | 0.7 |
| 1-2                                             | 18,611 (16.7) | 23,130 (15.6)  | 2.8  | 16.7 | 16.7 | 0.3 |
| ≥3                                              | 4488 (4.0)    | 5910 (4.0)     | 0.1  | 4.0  | 4.2  | 1.0 |

\* Propensity score weighting with the fine stratification method

# Country shown descriptively; ; the propensity score was estimated stratified by country

† Mean age shown descriptively; age group by categories was included in the propensity score.

‡ Variable not available in Norwegian data; percentages shown are calculated on Swedish and Danish data.

**eFigure 1.** Flow Chart of Cohort Inclusion – Analysis of GLP1 Receptor Agonists vs. SGLT2 Inhibitors

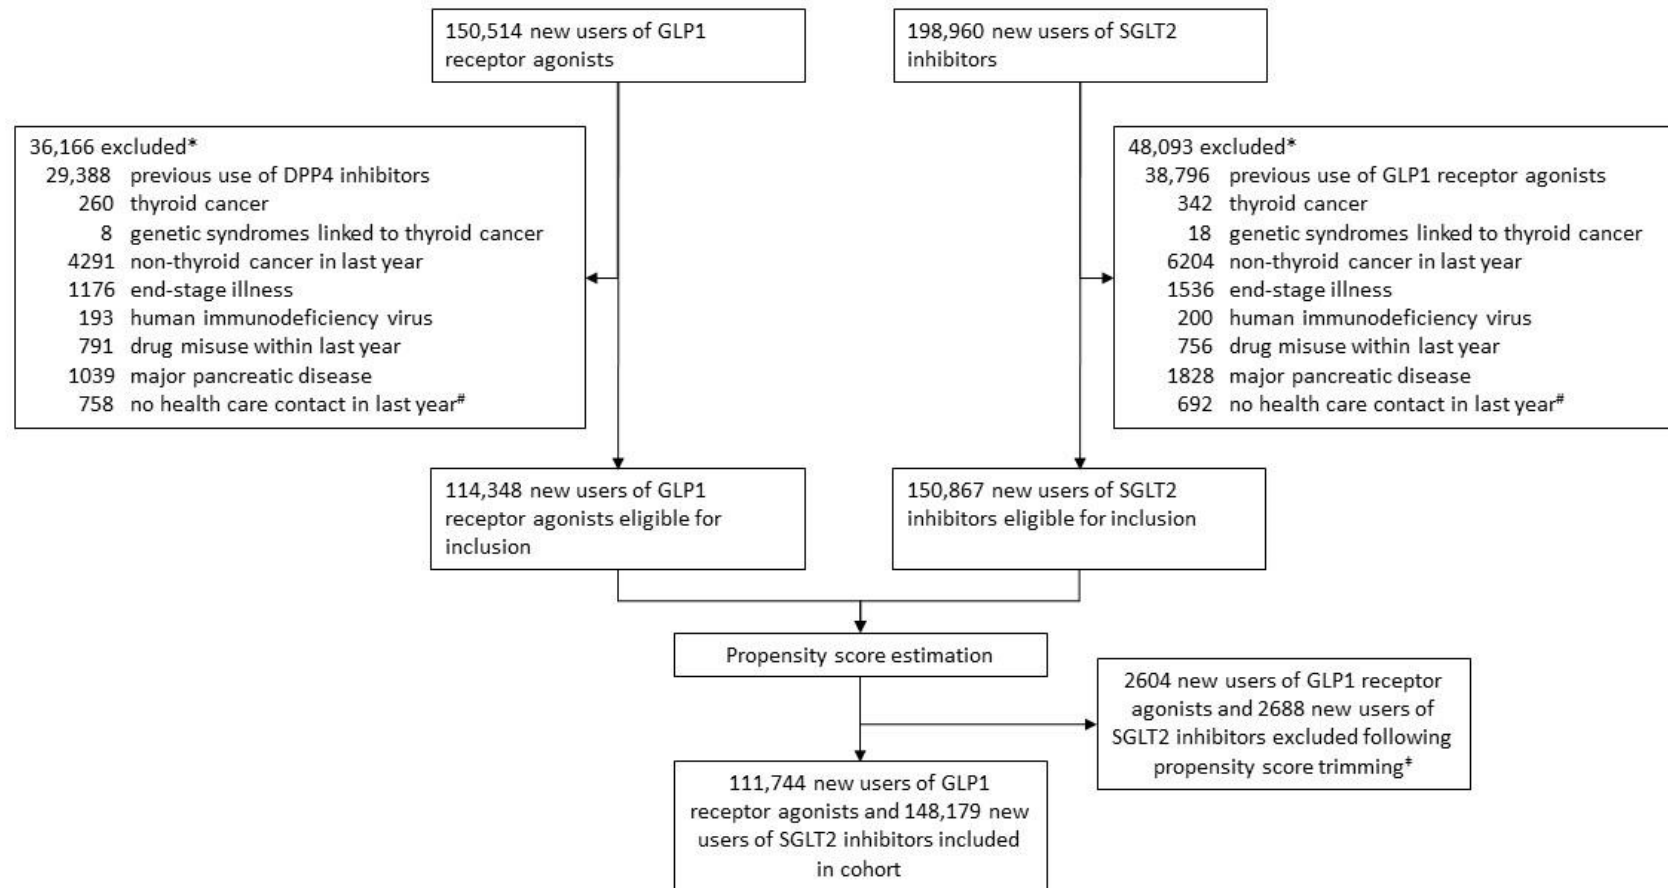

\*Patients could be excluded due to more than one reason.

<sup>#</sup> Defined as neither specialist care contact nor use of any prescription drug.

<sup>†</sup> Trimming of 1% of the study cohort on each end of the common propensity score distribution.



**eFigure 2.** Cumulative Incidence of Thyroid Cancer in Analysis of GLP1 Receptor Agonists vs. SGLT2 Inhibitors

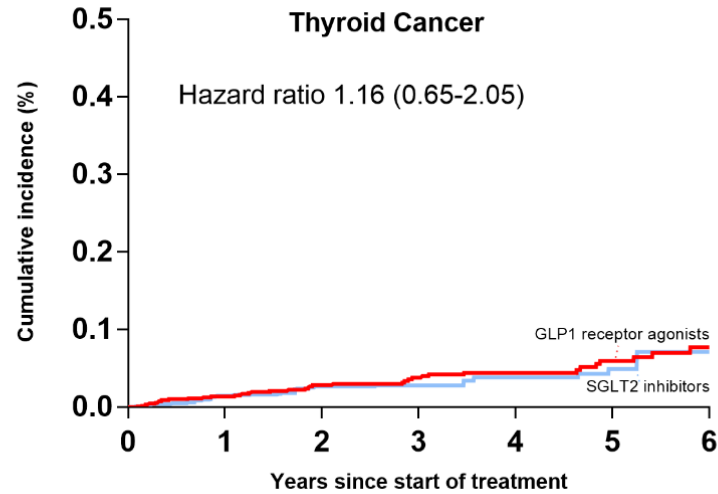

**Number at risk**

|                        |         |        |        |        |
|------------------------|---------|--------|--------|--------|
| GLP1 receptor agonists | 111,744 | 65,017 | 35,037 | 12,435 |
| SGLT2 inhibitors       | 148,179 | 73,793 | 24,588 | 4607   |

The cumulative incidence curve and the hazard ratio are adjusted for all variables shown in Table 1 using propensity score fine stratification weighting.

The cumulative incidence curve was truncated at 6 years due to decreasing numbers of participants and outcome events; maximum follow-up in the analysis was 8 years.
